# Supplementary material for: Through the limelight: Analysing the earliest collection of magic lantern glass slides in Portugal
Source: Research Square preprint supplement (doi:10.21203/rs.3.rs-6785763/v1), 2025-06-09
Supplement: Supplementary file 1 [file b8d6dccaacf8879ae3e39fe6.docx]

**Through the limelight: Analysing the earliest collection of magic lantern glass slides in Portugal**

Márcia Vilarigues*1, Alexandra Rodrigues1, Ângela Santos1, Carla Machado1, Sofia Pires1, Gilberto Pereira2,3, Vanessa Otero1,4

1 VICARTE research unit, Department of Conservation and Restoration, NOVA School of Sciences and Technology (NOVA FCT), Caparica, Portugal

2 Museu de Ciência da Universidade de Coimbra, Largo Marques de Pombal, Coimbra, Portugal

3 Centro de Física da Universidade de Coimbra, Rua Larga, Coimbra, Portugal

4 LAQV-REQUIMTE research unit, Department of Conservation and Restoration, NOVA School of Sciences and Technology (NOVA FCT), Caparica, Portugal

**Supplementary Information**

**
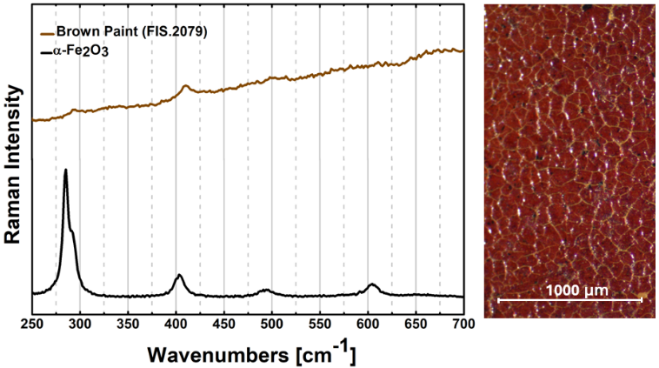
**

**Fig. S1.** Raman spectrum of the brown paint of slide FIS.2079 identifying hematite

**
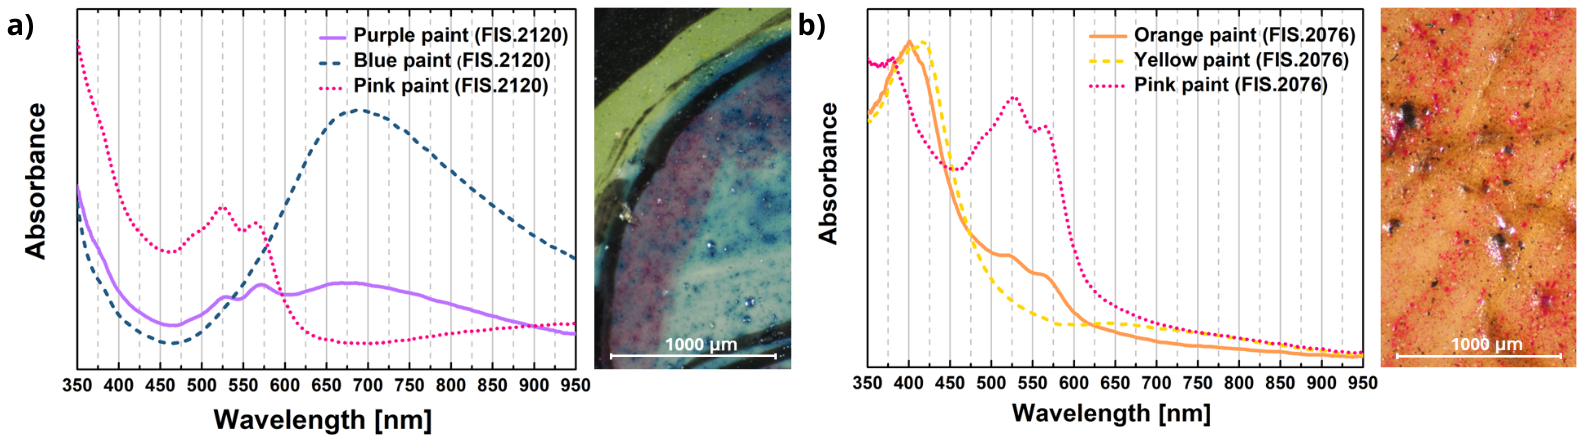
**

**Fig. S2.** Representative UV-VIS spectrum of (a) the purple paints and (b) orange paints in the analysed slides


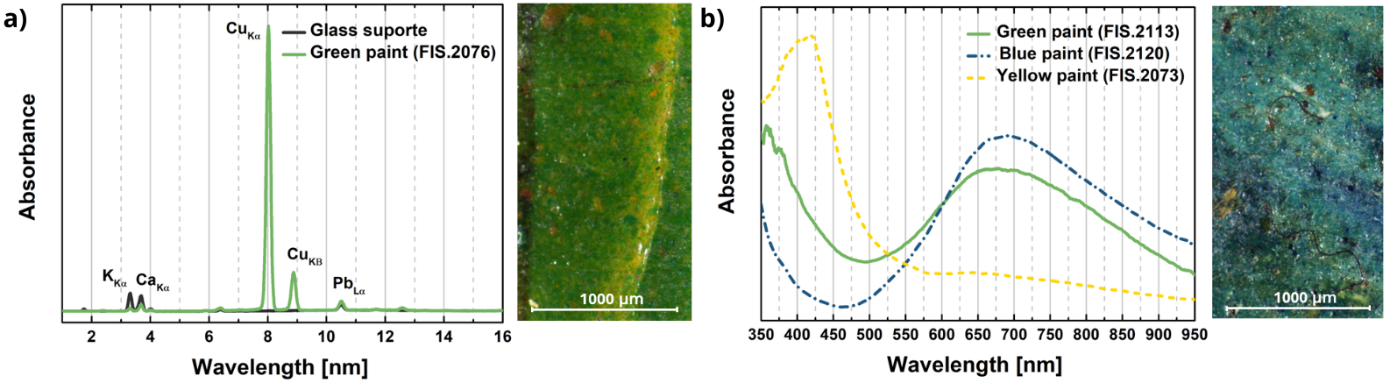


**Fig. S3.** (a) Representative EDXRF spectrum of the green paints from groups A and D and (b) Representative UV-VIS spectrum of green paints from groups B and C.
